# Supplementary material for: Shift of Volatile Organic Compounds (VOCs) in Gluten-Free Hemp-Enriched Sourdough Bread: A Metabolomic Approach
Source: PubMed Central journal article supplement (PMC7230689; doi:10.3390/nu12041050), 2020-04-10
Supplement: nutrients-12-01050-s001.pdf [file nutrients-12-01050-s001.pdf]

**Table S1.** Proximate composition of flours (w/w).

| Flour types        | Protein (%) | Carbohydrates (%) | Fiber (%) | Fats (%) | Energy (kJ/100g) |
|--------------------|-------------|-------------------|-----------|----------|------------------|
| Maize <sup>1</sup> | 8.5         | 76.1              | 2.1       | 1.3      | 1503             |
| Rice <sup>2</sup>  | 7.0         | 79.0              | 1.0       | 0.5      | 1489             |
| Hemp <sup>3</sup>  | 31.0        | 3.1               | 49.0      | 8.1      | 1253             |

Commercial organic flours from: <sup>1</sup>maize (Molino Rossetto SpA, Pontelongo, Italy), <sup>2</sup>rice (Molino Rossetto SpA, Italy), <sup>3</sup>hemp seed (Hanf & Natur, Lindlar, Germany).

**Table S2.** Dough formulations.

| Dough types | Maize <sup>1</sup> (g) | Rice <sup>2</sup> (g) | Hemp <sup>3</sup> (g) | Sourdough (g)       | NaCl (g) | sterile water (ml) | HPMC <sup>4</sup> (g) |
|-------------|------------------------|-----------------------|-----------------------|---------------------|----------|--------------------|-----------------------|
| H           | 302.32                 | 75.20                 | 21.27                 |                     | 4.00     | 340.00             | 5.60                  |
| YH+         | 241.86                 | 60.16                 | 17.73                 | 140.00 <sup>5</sup> | 3.20     | 272.00             | 4.48                  |
| S           | 319.40                 | 80.96                 |                       |                     | 4.00     | 340.00             | 5.60                  |
| YS+         | 255.52                 | 64.77                 |                       | 140.00 <sup>6</sup> | 3.20     | 272.00             | 4.48                  |

Commercial organic flours from: <sup>1</sup>maize (Molino Rossetto SpA, Pontelongo, Italy), <sup>2</sup>rice (Molino Rossetto SpA, Italy), <sup>3</sup>hemp seed (Hanf & Natur, Lindlar, Germany); <sup>4</sup>HPMC = Hydroxy propyl methyl cellulose (Bioline Integratori, Canaro, Italy); <sup>5</sup>LAB fermented hemp seed enriched dough; <sup>6</sup>LAB fermented maize/rice dough.

**Table S3.** pH values.

| Sample | Baseline |   | End of fermentation |      |   |                   |
|--------|----------|---|---------------------|------|---|-------------------|
| SX     | 5.95     | ± | 0.02 <sup>c</sup>   | 4.70 | ± | 0.08 <sup>b</sup> |
| SL     | 5.50     | ± | 0.02 <sup>b</sup>   | 3.60 | ± | 0.08 <sup>a</sup> |
| SY     | 5.80     | ± | 0.03 <sup>c</sup>   | 4.92 | ± | 0.15 <sup>b</sup> |
| HX     | 5.94     | ± | 0.04 <sup>c</sup>   | 5.35 | ± | 0.17 <sup>b</sup> |
| HL     | 6.27     | ± | 0.04 <sup>c</sup>   | 4.14 | ± | 0.12 <sup>a</sup> |
| HY     | 6.36     | ± | 0.03 <sup>c</sup>   | 4.40 | ± | 0.21 <sup>b</sup> |
| YS     | 5.80     | ± | 0.03 <sup>c</sup>   | 5.92 | ± | 0.06 <sup>c</sup> |
| YS+    | 5.09     | ± | 0.09 <sup>b</sup>   | 4.22 | ± | 0.07 <sup>a</sup> |
| YH     | 6.36     | ± | 0.01 <sup>c</sup>   | 5.81 | ± | 0.11 <sup>c</sup> |
| YH+    | 4.91     | ± | 0.12 <sup>b</sup>   | 4.11 | ± | 0.12 <sup>a</sup> |

Different letters indicate statistical significance (at least p<0.05). For samples abbreviations see Table 1.

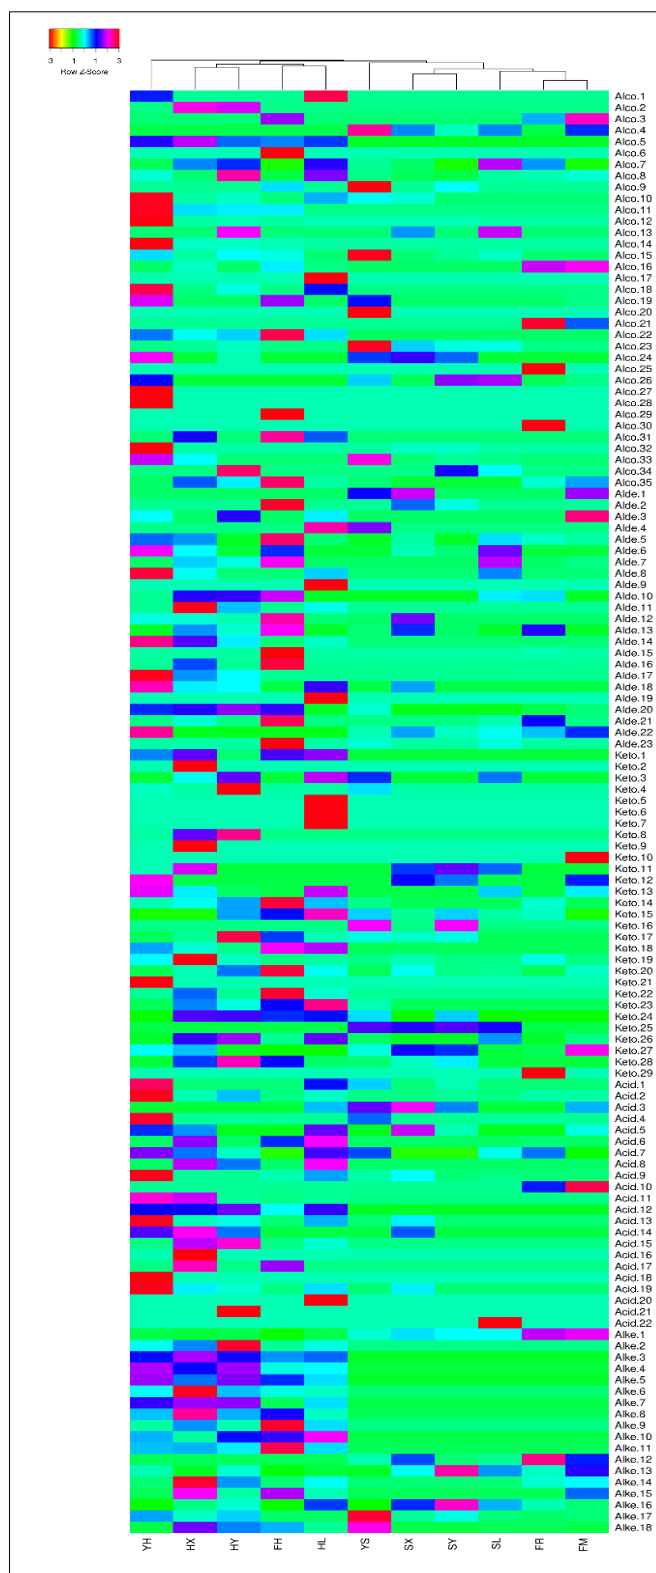

**Figure S1.** Heatmap of relative quantification of means of VOCs of flour samples and not fermented dough samples. Alco 1 = Propanol methyl; Alco 2 = Butanol, methyl acetate; Alco 3 = Butanetriol; Alco 4 = 1-Pentanol; Alco 5 = Thymol; Alco 6 = 2-Furanmethanol; Alco 7 = 1- Hexanol; Alco 8 = 1-hexanol 2 ethyl; Alco 9 = Hexanol trimethyl; Alco 10 = 1-Heptanol; Alco 11 = Hepten-1-ol (E); Alco 12 = 1-Octanol; Alco 13 = Octenol; Alco 14 = 2-octen-1-ol, (E); Alco 15 = 1-Octanol, 2-butyl; Alco 16 = 3,5 Octadien-2-ol; Alco 17 = 1-Nonanol; Alco 18 = 1-Nonen-3-ol; Alco 19 = 2-Decanol; Alco 20 = 2-Decen-1-ol (E); Alco 21 = Decadienol (E,E); Alco 22 = Borneol; Alco 23 = 2-Undecanol; Alco 24 = 2-Dodecanol; Alco 25 = Isotridecanol; Alco 26 = 2-Tetradecanol; Alco 27 = 1-Hexadecanol; Alco 28 = 2-Heptadecanol; Alco 29 = 1,2 Cyclopentanediol 3 mehtyl; Alco 30 = Cyclohexanol; Alco 31 = Terpeneol; Alco 32 = Benzyl

Alcohol; Alco 33 = Ethanol, 2,2'-oxybis; Alco 34 = Phenol; Alco 35 = Phenylethyl alcohol; Alde 1 = Acetaldehyde; Alde 2 = Butanal 3 methyl; Alde 3 = 2 Butenal 2 methyl (E); Alde 4 = Furfural; Alde 5 = Hexanal; Alde 6 = Hexenal, (E); Alde 7 = Heptanal; Alde 8 = 2-Heptenal (Z); Alde 9 = 2,4-Heptadienal (E,E); Alde 10 = Octanal; Alde 11 = 2 Octenal 2 butyl; Alde 12 n= Nonanal; Alde 13 = 2 Nonenal (Z); Alde 14 = 2,4-Nonadienal, (E,E); Alde 15 = Nonadienal; Alde 16 = 2-Decenal (E); Alde 17 = 2,4-Decadienal; Alde 18 = Dodecanal; Alde 19 = Tetradecanal; Alde 20 = 7 Hexadecenal ( Z ); Alde 21 = Octadecenal; Alde 22 = Benzaldehyde; Alde 23 = Benzeneacetaldehyde; Keto 1 = Ethanone; Keto 2 = Propanone cyclopropyl; Keto 3 = Butanone; Keto 4 = Butanedione; Keto 5 = Pentanone; Keto 6 = 1-Pentanone-2-hydroxy; Keto 7 = Pentanedione; Keto 8 = Ethylcyclopentanone; Keto 9 = Cyclopentenone hydroxy; Keto 10 = Hexanone; Keto 11= Hexenone; Keto 12= Hexanone methyl; Keto 13 = Cyclohexanone butenyl; Keto 14= Heptanone; Keto 15 = Heptenone methtyl; Keto 16 = Heptanone dimethyl; Keto 17 = Octanone; Keto 18 = Octenone; Keto 19 = Octanone dimethyl; Keto 20 = Octadienone (E,E); Keto 21 = Nonanone; Keto 22 = Trans nonenone; Keto 23 = Decanone; Keto 24 = (R) Bornane dione; Keto 25 = Undecanone; Keto 26 = Undecenone butyl dimethyl ( E ); Keto 27 = Undecadienone dimethyl (E); Keto 28 n= Gamma dodecalactone; Keto 29 = Pentadecanone; Acid 1 = Ethyl acetate; Acid 2 = Formic acid; Acid 3 = Propanoic acid; Acid 4 = Propanoic acid hydroxy; Acid 5 = 2-Propenoic acid; Acid 6 = Butanoic acid; Acid 7 = Pentanoic acid; Acid 8 = Valeric acid; Acid 9= Hexanoic acid; Acid 10 = Sorbic acid; Acid 11 = Heptanoic acid; Acid 12 = Heptenoic acid; Acid 13 = Octanoic acid; Acid 14 = Nonanoic acid; Acid 15 = Nonenoic acid; Acid 16 = n-Decanoic acid; Acid 17 = Tetradecanoic acid hydroxy; Acid 18 = Pentadecanoic acid; Acid 19 = n-Hexadecanoic acid; Acid 20 = Heptadecanoic acid; Acid 21 = Nonadecanoic acid; Acid 22 = Thiophene acetic acid; Alke 1= Limonene; Alke 2 = Beta-phellandrene; Alke 3 = p-menthatriene; Alke 4 = Delta-3-carene; Alke 5 = Alpha-bergamotene; Alke 6 = Alpha-farnesene; Alke 7 = Beta-caryophyllene; Alke 8 = Caryophyllene oxyde; Alke 9 = (R) alpha pinene; Alke 10 = Camphene; Alke 11 = Hexadecene (Z) ; Alke 12= Heptadecene; Alke 13 = Octadecene (E); Alke 14 = Nonadecene; Alke 15 = Decene; Alke 16 = Undecene methyl (E); Alke 17 = Tetradecene (E); Alke 18 = Eicosene (E).

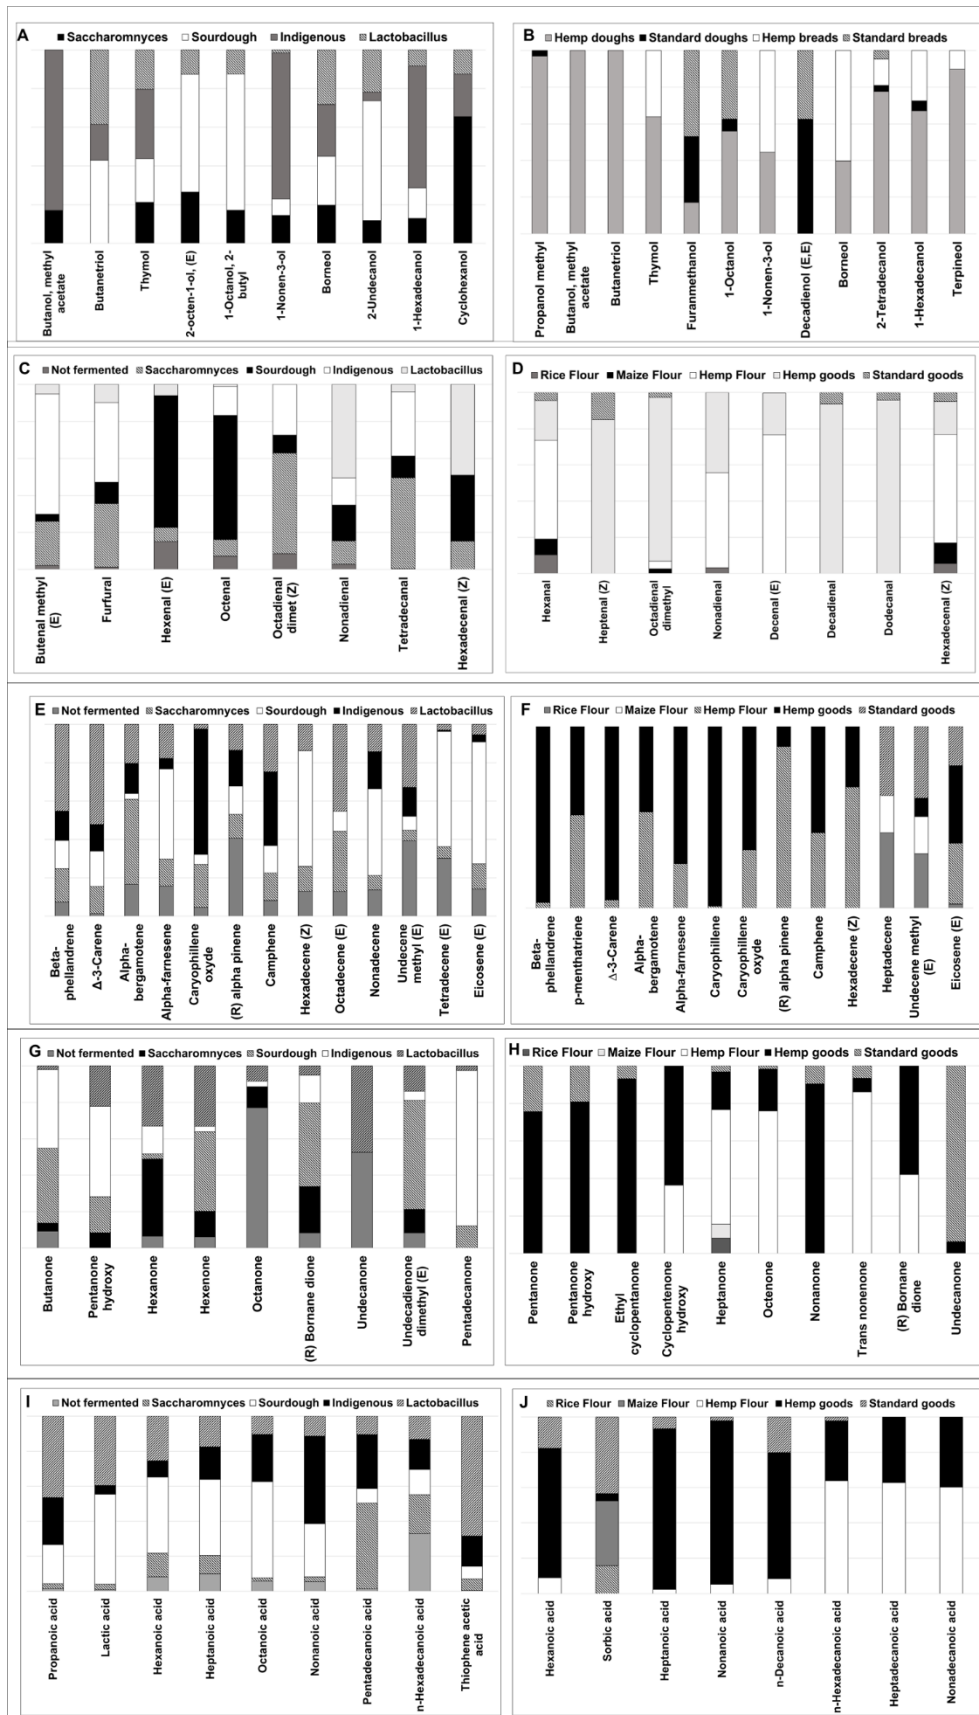

**Figure S2.** MANOVA ( $p < 0.01$ ) of VOCs on samples. **A)** Alcohols for the starter category; **B)** Alcohols for the matrix category; **C)** Aldehydes for the starter category; **D)** Aldehydes for the matrix category; **E)** Alkenes for the starter category; **F)** Alkenes for the matrix category; **G)** Ketones for the starter category; **H)** Ketones for the matrix category; **I)** Organic acids for the starter category; **J)** Organic acids for the matrix category.
